# Supplementary material
Source: PubMed Central journal article supplement (PMC8051928)
Supplement: mmc1.pdf [file mmc1.pdf]

# THE LANCET

## Respiratory Medicine

### **Supplementary appendix**

This appendix formed part of the original submission and has been peer reviewed. We post it as supplied by the authors.

Supplement to: Gorman E, Connolly B, Couper K, et al. Non-invasive respiratory support strategies in COVID-19. *Lancet Respir Med* 2021; published online April 16. [http://dx.doi.org/10.1016/S2213-2600\(21\)00168-5](http://dx.doi.org/10.1016/S2213-2600(21)00168-5).

**Table: Guideline recommendations on non-invasive ventilation strategies for adult patients with COVID-19 acute hypoxaemic respiratory failure**

|               | Organisation                                                                                                                 | Guideline                                                                                                                                                                                                                                                                                                                                                                                                                                                                                                                                               | Overview of non-invasive respiratory strategies* |                                       |                                                               |
|---------------|------------------------------------------------------------------------------------------------------------------------------|---------------------------------------------------------------------------------------------------------------------------------------------------------------------------------------------------------------------------------------------------------------------------------------------------------------------------------------------------------------------------------------------------------------------------------------------------------------------------------------------------------------------------------------------------------|--------------------------------------------------|---------------------------------------|---------------------------------------------------------------|
|               |                                                                                                                              |                                                                                                                                                                                                                                                                                                                                                                                                                                                                                                                                                         | HFNO                                             | CPAP                                  | BIPAP/NIV                                                     |
| <b>GLOBAL</b> |                                                                                                                              |                                                                                                                                                                                                                                                                                                                                                                                                                                                                                                                                                         |                                                  |                                       |                                                               |
|               | <b>World Health Organization</b>                                                                                             | Clinical management of COVID 19 (May 2020)<br><a href="https://www.who.int/publications/i/item/clinical-management-of-covid-19">https://www.who.int/publications/i/item/clinical-management-of-covid-19</a>                                                                                                                                                                                                                                                                                                                                             | Conditional recommendation                       | Conditional recommendation            | Conditional recommendation                                    |
|               | <b>Surviving Sepsis Campaign</b>                                                                                             | Guidelines on the Management of Critically Ill Adults with Coronavirus Disease 2019 (COVID-19) (January 2021)<br><a href="https://journals.lww.com/ccmjournal/Abstract/9000/Surviving_Sepsis_Campaign_Guidelines_on_the.95371.aspx">https://journals.lww.com/ccmjournal/Abstract/9000/Surviving_Sepsis_Campaign_Guidelines_on_the.95371.aspx</a>                                                                                                                                                                                                        | Weak recommendation                              | Not specifically mentioned            | Weak recommendation                                           |
| <b>UK</b>     |                                                                                                                              |                                                                                                                                                                                                                                                                                                                                                                                                                                                                                                                                                         |                                                  |                                       |                                                               |
|               | <b>NHS England~</b>                                                                                                          | Guidance for the role and use of non-invasive respiratory support in adult patients with COVID-19 (November 2020)<br><a href="https://www.nice.org.uk/Media/Default/About/COVID-19/Specialty-guides/specialty-guide-NIV-respiratory-support-and-coronavirus.pdf">https://www.nice.org.uk/Media/Default/About/COVID-19/Specialty-guides/specialty-guide-NIV-respiratory-support-and-coronavirus.pdf</a> ;<br><a href="https://www.nice.org.uk/guidance/ng191/chapter/Recommendations">https://www.nice.org.uk/guidance/ng191/chapter/Recommendations</a> | Does not support                                 | Supports                              | Only for hypercapnic acute-on-chronic ventilatory failure     |
|               | <b>British Thoracic Society/Intensive Care Society</b>                                                                       | Respiratory care in patients with Acute Hypoxaemic Respiratory Failure associated with COVID-19 (January 2021)<br><a href="https://www.brit-thoracic.org.uk/covid-19/covid-19-information-for-the-respiratory-community/">https://www.brit-thoracic.org.uk/covid-19/covid-19-information-for-the-respiratory-community/</a>                                                                                                                                                                                                                             | Supports (trial enrolment suggested#)            | Supports (trial enrolment suggested#) | Not specifically mentioned                                    |
|               | <b>Faculty of Intensive Care Medicine/Intensive Care Society/Association of Anaesthetists/Royal College of Anaesthetists</b> | Clinical guide for the management of critical care for adults with COVID-19 during the coronavirus pandemic (October 2020)<br><a href="https://icmanaesthesiacovid-19.org/clinical-guide-for-the-management-of-critical-care-for-adults-with-covid-19-during-the-coronavirus-pandemic">https://icmanaesthesiacovid-19.org/clinical-guide-for-the-management-of-critical-care-for-adults-with-covid-19-during-the-coronavirus-pandemic</a>                                                                                                               | Supports in the context of trial enrolment#      | Supports                              | Consider for hypercapnic acute-on-chronic ventilatory failure |



| EUROPE                |                                                                                                       |                                                                                                                                                                                                                                                                                                                                                                                                                                                                     |                            |                            |                                                           |
|-----------------------|-------------------------------------------------------------------------------------------------------|---------------------------------------------------------------------------------------------------------------------------------------------------------------------------------------------------------------------------------------------------------------------------------------------------------------------------------------------------------------------------------------------------------------------------------------------------------------------|----------------------------|----------------------------|-----------------------------------------------------------|
|                       | <b>Italian Thoracic Society/Italian Respiratory Society</b>                                           | Managing the respiratory care of patients with COVID-19 (March 2020)<br><a href="https://ers.app.box.com/s/j09ysr2kdhmkcu1ulm8y8dxnosm6yi0h">https://ers.app.box.com/s/j09ysr2kdhmkcu1ulm8y8dxnosm6yi0h</a>                                                                                                                                                                                                                                                         | Supports                   | Supports                   | Supports                                                  |
|                       | <b>Societe de Pneumologie de Langue Francaise</b>                                                     | Procedure for pulmonary management of non-ICU patients hospitalized in the context of the COVID-19 pandemic (April 2020)<br><a href="https://splf.fr/covid-19-docs-english-version/">https://splf.fr/covid-19-docs-english-version/</a>                                                                                                                                                                                                                             | Conditional recommendation | Conditional recommendation | Conditional recommendation                                |
|                       | <b>Irish Thoracic Society</b>                                                                         | Respiratory Management of Patients with COVID-19 (January 2021)<br><a href="https://irishthoracicsociety.com/wp-content/uploads/2020/03/Respiratory-Mgt-Guideline-V2-Jan-2021.20.01.pdf">https://irishthoracicsociety.com/wp-content/uploads/2020/03/Respiratory-Mgt-Guideline-V2-Jan-2021.20.01.pdf</a>                                                                                                                                                            | Supports                   | Supports                   | Only for hypercapnic acute-on-chronic ventilatory failure |
|                       | <b>German Respiratory Society</b>                                                                     | Position statement for the State-of-the-Art Application of Respiratory Support in Patients with COVID-19 (June 2020)<br><a href="https://www.karger.com/Article/FullText/509104">https://www.karger.com/Article/FullText/509104</a><br><br>German recommendations for critically ill patients with COVID-19 (April 2020)<br><a href="https://link.springer.com/article/10.1007/s00063-020-00689-w">https://link.springer.com/article/10.1007/s00063-020-00689-w</a> | Conditional recommendation | Conditional recommendation | Conditional recommendation                                |
| AUSTRALIA/NEW ZEALAND |                                                                                                       |                                                                                                                                                                                                                                                                                                                                                                                                                                                                     |                            |                            |                                                           |
|                       | <b>Australia and New Zealand Intensive Care Society/National COVID-19 Clinical Evidence Taskforce</b> | COVID-19 Guidelines (January 2021)<br><a href="https://www.anzics.com.au/coronavirus-guidelines/">https://www.anzics.com.au/coronavirus-guidelines/</a><br><a href="https://covid19evidence.net.au/">https://covid19evidence.net.au/</a><br><a href="https://www.anzics.com.au/coronavirus-guidelines/">https://www.anzics.com.au/coronavirus-guidelines/</a>                                                                                                       | ;                          | Not specifically mentioned | Conditional recommendation                                |

| NORTH AMERICA |                                            |                                                                                                                                                                                                                                                                                                                                                                            |                            |                            |                            |
|---------------|--------------------------------------------|----------------------------------------------------------------------------------------------------------------------------------------------------------------------------------------------------------------------------------------------------------------------------------------------------------------------------------------------------------------------------|----------------------------|----------------------------|----------------------------|
|               | <b>Government of Canada</b>                | Clinical management of patients with moderate to severe COVID 19 – interim guidance (August 2020)<br><a href="https://www.canada.ca/en/public-health/services/diseases/2019-novel-coronavirus-infection/clinical-management-covid-19.html">https://www.canada.ca/en/public-health/services/diseases/2019-novel-coronavirus-infection/clinical-management-covid-19.html</a> | Conditional recommendation | Not specifically mentioned | Conditional recommendation |
|               | <b>National Institutes of Health (NIH)</b> | Care of critically ill patients with COVID-19 (December 2020)<br><a href="https://www.covid19treatmentguidelines.nih.gov/critical-care/">https://www.covid19treatmentguidelines.nih.gov/critical-care/</a>                                                                                                                                                                 | Moderate recommendation    | Not specifically mentioned | Moderate recommendation    |
| ASIA          |                                            |                                                                                                                                                                                                                                                                                                                                                                            |                            |                            |                            |
|               | <b>China National Health Commission</b>    | Chinese Clinical Guidance for COVID-19 Pneumonia Diagnosis and Treatment (March 2020)<br><a href="http://kify.meetingchina.org/msite/news/show/cn/3337.html">http://kify.meetingchina.org/msite/news/show/cn/3337.html</a>                                                                                                                                                 | Supports                   | Not specifically mentioned | Supports                   |

Notes: \*Most recent version of available guidelines used, please refer to links to source documents for full detail. Where documents are available as formal guidelines, specific wording with regards to strength of recommendation are used. Where documents are available as guidance for clinical pathways, use of the term ‘Supports’ has been used where a modality is included in the content. ~This guidance is now being incorporated into NICE Guideline NG191 COVID-19 rapid guideline: managing COVID-19; as of 12<sup>th</sup> April 2021 NICE is reviewing the evidence for respiratory support and further recommendations will be added to updated guideline versions available at the link provided. #Perkins GD, Couper K, Connolly B, et al. RECOVERY- Respiratory Support: Respiratory Strategies for patients with suspected or proven COVID-19 respiratory failure; Continuous Positive Airway Pressure, High-flow Nasal Oxygen, and standard care: A structured summary of a study protocol for a randomised controlled trial. *Trials* 2020;21(1):687. doi: 10.1186/s13063-020-04617-3

Abbreviations: HFNO = high-flow nasal oxygen, CPAP = continuous positive airway pressure, BIPAP = bilevel positive airway pressure, NIV = non-invasive ventilation
